# Supplementary material for: Photocatalytic C–C coupling reactions of benzyl alcohol for obtaining hydrobenzoin over Z-scheme ZnS/ZnIn2S4
Source: Royal Society of Chemistry journal article supplement (doi:10.1039/d4cy00786g), 2024-01-01
Supplement: d4cy00786g1.pdf [file d4cy00786g1.pdf]

## Supporting Information

### Photocatalytic C-C coupling reactions of benzyl alcohol for hydrobenzoin over Z-scheme ZnS/ZnIn<sub>2</sub>S<sub>4</sub>

Xinyu Jin,<sup>a</sup> Chun Cai.<sup>\*a</sup>

<sup>a</sup> School of Chemistry and Chemical Engineering, Nanjing University of Science & Technology, Xiaolingwei 200, Nanjing 210094, P. R. China.

\*E-mail: c.cai@njjust.edu.cn

**Experiment section:** Characterizations, Calculation of the band gap energy ( $E_g$ ).

**Table S1.** Chemical compositions of  $ZnIn_2S_4$  and  $ZnS/ZnIn_2S_4$  hybrids obtained from ICP-MS.

**Table S2.** Structural properties of  $ZnIn_2S_4$ ,  $ZnS/ZnIn_2S_4-2$  and  $ZnS$ .

**Table S3.** Comparison of the selective benzyl alcohol C-C coupling performance over different photocatalysts.

**Table S4.** The results of control experiments for studying the reaction mechanism.

**Table S5.** The selective coupling of different aldehyde with  $ZnS/ ZnIn_2S_4-2$  as the photocatalyst.

**Fig. S1** (a) XRD patterns of the  $ZnS$  and (b) XRD patterns of six samples.

**Fig. S2** HR-TEM image of (a)  $ZnIn_2S_4$  (b)  $ZnS$  (c)  $ZnS/ZnIn_2S_4-2$ .

**Fig. S3** SAED patterns of (a)  $ZnIn_2S_4$  (b)  $ZnS$  (c)  $ZnS/ ZnIn_2S_4-2$

**Fig. S4** EPR spectra of DMPO-ketyl radical for  $ZnS$ ,  $ZnIn_2S_4$  and  $ZnS/ZnIn_2S_4-2$ .

**Fig. S5** Light absorption of  $I_3^-$  (typical absorbance at 350 nm) in the solution after photocatalytic reaction with addition of excess KI to detect the produced  $H_2O_2$ .

**Data for C-C coupling products of aryl alcohols.**

**$^1H$  NMR for C-C coupling products of aryl alcohols.**

## Experimental section

**Characterizations.** X-ray diffraction (XRD) patterns were performed using a Rigaku smartlab9 (40KV, 150mA) with Cu K $\alpha$  radiation. The morphology and crystal phase of the samples were characterized using field emission transmission electron microscopy (FETEM, FEI Talos F200x), scanning electron microscope (SEM, FEI Nova NanoSEM 450), high-resolution transmission electron microscopy (HRTEM, FEI Talos F200x) with selected area electron diffraction (SAED). The elemental composition was investigated by energy-dispersive X-ray spectroscopy (EDX, FEI Talos F200x). UV-vis diffuse reflectance spectroscopy (DRS) was measured on a Shimadzu UV-3600plus, and collected data was converted from reflection to absorbance using the Kubelka-Munk function. X-ray photoelectron spectroscopy (XPS) data was performed on an ESCALAB 250Xi spectrometer, using an Al K $\alpha$  X-ray source (1350 eV of photons) and calibrated by setting the C 1s peak to 284.80 eV. Inductively coupled plasma mass spectrometry (ICP-MS) was analyzed on Optima 7300 DV. The BET surface area and pore size measurements were performed with N<sub>2</sub> adsorption/desorption isotherms at 77 K on a Micromeritics ASAP 2020 instrument. Before measurements, the samples were degassed at 80 °C for 12 h. Electron paramagnetic resonance (EPR) measurements were performed on a Bruker A300 EPR EMX Nano Spectrometer. The electrochemical and photoelectrochemical analysis was conducted on an electrochemical workstation (CHI1660E, Shanghai Chenhua Science Technology Co., Ltd.) with a conventional three-electrode cell, which used a Pt plate as the counter electrode, a BiVO<sub>4</sub> film as the working electrode and a saturated silver chloride electrode as the reference electrode. The electrochemical impedance spectroscopy (EIS) measurements were measured in the presence of 0.2 M Na<sub>2</sub>SO<sub>4</sub> solution in a frequency range from 0.1 Hz to 100 kHz under open circuit potential conditions. The photocurrent responses were measured in the presence of saturated KCl solution with Ag/AgCl as the reference electrode and the initial voltage was 0.7 V. The photoluminescence (PL) was analyzed on HORIBA HR Evolution with an excitation wavelength of 325 nm. GC-MS was performed on an ISQ Trace 1300 in the electron ionization (EI) mode. GC analyses are performed on an Agilent 7890A instrument (Column: Agilent 19091J-413: 30 m  $\times$  320  $\mu$ m  $\times$  0.25  $\mu$ m, carrier gas: H<sub>2</sub>, FID detection. The surface photovoltage spectroscopy (SPV) was measured by a stable surface photovoltage spectrometer (PL-SPV/IPCE 1000, Beijing Perfectlight Technology Co.,Ltd.).

**Calculation of the band gap energy (E<sub>g</sub>).** Since ZnS and ZnIn<sub>2</sub>S<sub>4</sub> is belonged to the direct band gap semiconductors, the following formula is used to calculate the E<sub>g</sub> of ZnIn<sub>2</sub>S<sub>4</sub>:

$$(\alpha h\nu)^n = K \times (h\nu - E_g)$$

where  $\alpha$  is the absorption coefficient,  $h\nu$  is the photon energy,  $K$  is a constant,  $E_g$  is the band gap energy and  $n$  is 2 because ZnS and ZnIn<sub>2</sub>S<sub>4</sub> belongs to direct semiconductor.

**Table S1.** Chemical compositions of ZnIn<sub>2</sub>S<sub>4</sub> and ZnS/ZnIn<sub>2</sub>S<sub>4</sub> hybrids obtained from ICP-MS.

| Sample                                  | Atomic% |       |       | Weight% |       |       | Zn: In: S<br>(Atomic) |
|-----------------------------------------|---------|-------|-------|---------|-------|-------|-----------------------|
|                                         | Zn      | In    | S     | Zn      | In    | S     |                       |
| ZnIn <sub>2</sub> S <sub>4</sub>        | 21.18   | 47.29 | 31.53 | 13.85   | 54.3  | 31.85 | 0.45:1:0.67           |
| ZnS/ZnIn <sub>2</sub> S <sub>4</sub> -1 | 36.9    | 35.23 | 27.87 | 24.12   | 40.45 | 35.43 | 1.05:1:0.79           |
| ZnS/ZnIn <sub>2</sub> S <sub>4</sub> -2 | 41.14   | 24.14 | 34.72 | 26.9    | 27.72 | 45.38 | 1.70:1:1.44           |
| ZnS/ZnIn <sub>2</sub> S <sub>4</sub> -3 | 48.56   | 22.16 | 29.28 | 31.75   | 25.44 | 42.81 | 2.19:1:1.32           |
| ZnS/ZnIn <sub>2</sub> S <sub>4</sub> -4 | 48.42   | 16.05 | 35.53 | 31.66   | 18.43 | 49.91 | 3.02:1:2.22           |

**Table S2.** Structural properties of ZnIn<sub>2</sub>S<sub>4</sub>, ZnS/ZnIn<sub>2</sub>S<sub>4</sub>-2 and ZnS.

| Samples                                     | BET surface area<br>(m <sup>2</sup> /g) | Pore volume<br>(cm <sup>3</sup> /g) | Average pore size<br>(nm) |
|---------------------------------------------|-----------------------------------------|-------------------------------------|---------------------------|
| ZnS                                         | 8.89                                    | 0.045                               | 27.76                     |
| ZnIn <sub>2</sub> S <sub>4</sub>            | 69.15                                   | 0.196                               | 12.05                     |
| ZnS/ ZnIn <sub>2</sub> S <sub>4</sub> -2    | 113.75                                  | 0.3111                              | 11.59                     |
| NV-ZnS/ ZnIn <sub>2</sub> S <sub>4</sub> -2 | 92.93                                   | 0.1179                              | 6.36                      |

**Table S3.** Comparison of the selective benzyl alcohol C-C coupling performance over different photocatalysts.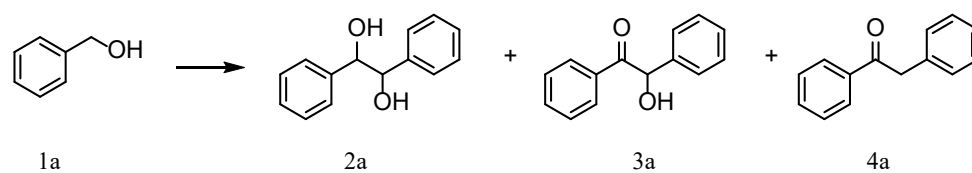

| Entry | Photocatalyst                                                    | Reaction condition                                                                           | 1a Con. (%) | Selectivity (%) |    |    |                   |
|-------|------------------------------------------------------------------|----------------------------------------------------------------------------------------------|-------------|-----------------|----|----|-------------------|
|       |                                                                  |                                                                                              |             | 2a              | 3a | 4a | Others (aldehyde) |
| 1     | CTAB/ZnIn <sub>2</sub> S <sub>4</sub> <sup>1</sup>               | 9.6 mM BAL, CH <sub>3</sub> CN, Ar, 7h, λ=455 nm (6 W blue LEDs)                             | 99          | 69              |    |    | 31                |
| 2     | Ag <sub>2</sub> S/CdS <sup>2</sup>                               | 100 mM BAL, CH <sub>3</sub> CN, Ar, 4h, λ=445 nm (6 W blue LEDs)                             | 100         | -               | -  | 97 | 3                 |
| 3     | Ag/CdS <sup>3</sup>                                              | 100 mM BAL, CH <sub>3</sub> CN, Ar, 4h, λ=445 nm (6 W blue LEDs)                             | 100         |                 | 95 |    | 5                 |
| 4     | CdS /Zn <sub>2</sub> In <sub>2</sub> S <sub>5</sub> <sup>4</sup> | 192 mM BAL, CH <sub>3</sub> CN, N <sub>2</sub> , 2h, λ> 400 nm (300W Xe lamp)                | 33          |                 | 96 |    | 4                 |
| 5     | Zn <sub>0.6</sub> In <sub>2</sub> S <sub>3.6</sub> <sup>5</sup>  | 200 mM BAL, CH <sub>3</sub> CN, Ar, 6h, λ=455 nm (6 W blue LEDs)                             | 99          | -               | 16 | 64 | 20                |
| 6     | CdS QDs <sup>6</sup>                                             | 2 mM BAL, H <sub>2</sub> O/D <sub>2</sub> O, Ar, 10h, λ=405nm                                | 100         | 49              | -  | 8  | 43                |
| 7     | ZnIn <sub>2</sub> S <sub>4</sub> <sup>7</sup>                    | 10 mM BAL, CH <sub>3</sub> CN (70 vol% H <sub>2</sub> O), N <sub>2</sub> , 10h, λ=440~460 nm | 100         | 2               | 58 | 40 | -                 |
| 8     | Ni@ZnIn <sub>2</sub> S <sub>4</sub> <sup>8</sup>                 | 15 mM BAL, CH <sub>3</sub> CN, N <sub>2</sub> , 2h, 300W Xe lamp                             | 86          | 99              | -  | -  | -                 |
| 9     | CdS/TiO <sub>2</sub> <sup>9</sup>                                | 20 mM BAL, CH <sub>3</sub> CN, CO <sub>2</sub> , 2h, λ > 420 nm                              | 28          | 95              | -  | -  | 5                 |
| 10    | HC-CdS <sub>2</sub> /Co <sup>10</sup>                            | 24 mM BAL, CH <sub>3</sub> CN, Ar, 9h, λ=420 nm                                              | 92          | 97              | -  | -  | -                 |
| 11    | DTAB/ZnIn <sub>2</sub> S <sub>4</sub> <sup>11</sup>              | 70 mM BAL, CH <sub>3</sub> CN, N <sub>2</sub> , 11h, λ > 400 nm (300 W Xe lamp)              | 99          | 54              | 31 | 12 | -                 |
| 12    | ZnIn <sub>2</sub> S <sub>4</sub> -P <sup>12</sup>                | 90 mM BAL, DMF, N <sub>2</sub> , 6h, λ=455 nm (blue LEDs)                                    | 95          | 81              | 7  | -  | 12                |
| 13    | ZnS/ZnIn <sub>2</sub> S <sub>4</sub> -2 (This work)              | 96 mM BAL, DMF (10 vol% H <sub>2</sub> O), air, 2h, λ=415 nm (12 W LEDs)                     | 100         | 92              | 5  | 1  | 2                 |

**Table S4.** The results of control experiments for studying the reaction mechanism. <sup>[a]</sup>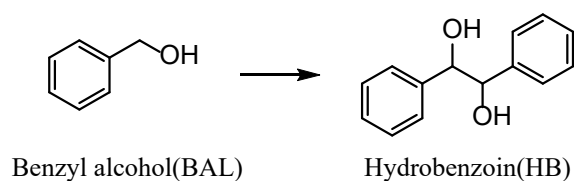

| Entry | Photocatalyst                           | Light  | BAL                     | HB                      |
|-------|-----------------------------------------|--------|-------------------------|-------------------------|
|       |                                         |        | Con. <sup>[b]</sup> (%) | Sel. <sup>[b]</sup> (%) |
| 1     | ZnS/ZnIn <sub>2</sub> S <sub>4</sub> -2 | 415 nm | 100                     | 93                      |
| 2     | /                                       | 415 nm | 0                       | -                       |
| 3     | ZnS/ZnIn <sub>2</sub> S <sub>4</sub> -2 | /      | 0                       | -                       |

[a] Reaction conditions: 10 mg ZnS/ZnIn<sub>2</sub>S<sub>4</sub>-2, 5 mL solvent: DMF (10 vol% H<sub>2</sub>O), 0.48 mmol Benzyl alcohol, 415 nm, air, 2 h. [b] the data were obtained by GC.

**Table S5.** The selective coupling of different aldehyde with ZnS/ZnIn<sub>2</sub>S<sub>4</sub>-2 as the photocatalyst. <sup>[a]</sup>

| Entry | Substrate | Con. <sup>[b]</sup> (%) | Selectivity <sup>b</sup> (%) |    |    |                  |
|-------|-----------|-------------------------|------------------------------|----|----|------------------|
|       |           |                         | 2a                           | 3a | 4a | Others(aldehyde) |
| 1     |           | 99                      | 65                           | 3  | 1  | 31               |
| 2     |           | 100                     | 98                           | 1  | 1  | 0                |

[a] Reaction conditions: 10 mg ZnS/ZnIn<sub>2</sub>S<sub>4</sub>-2, 5 mL solvent: DMF (10 vol% H<sub>2</sub>O), 0.48 mmol substrates, 415 nm, air, 8 h. [b] the data were obtained by GC.

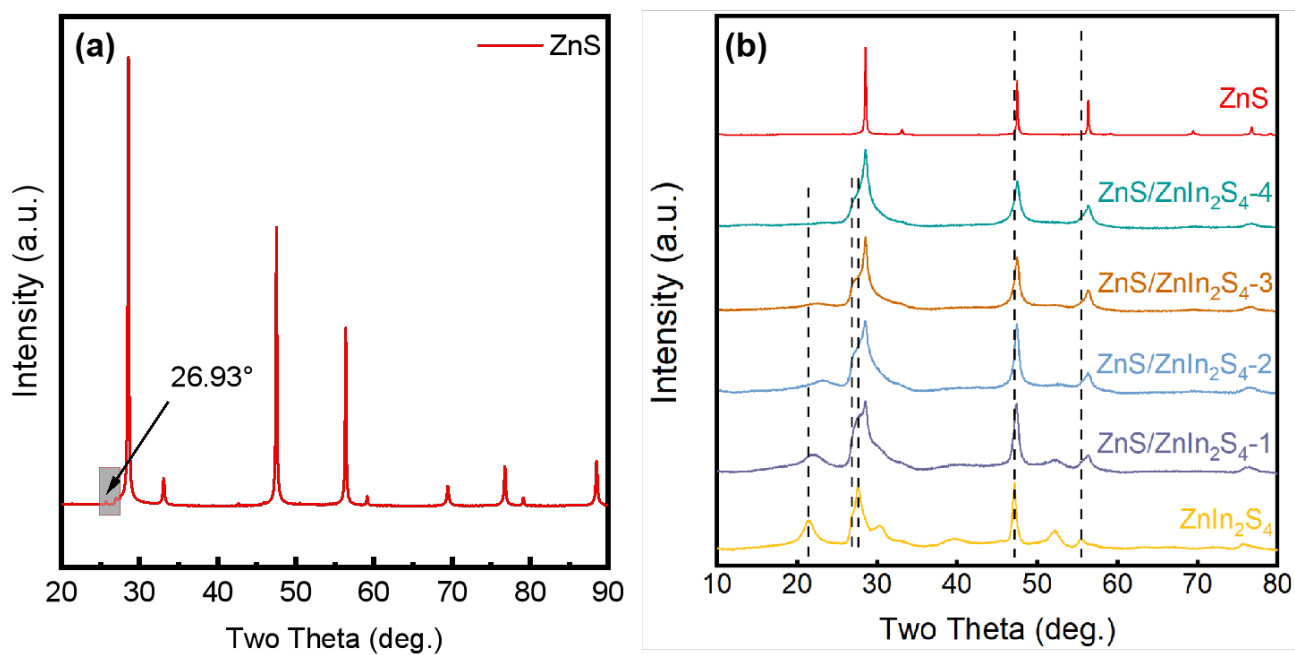

Fig. S1 (a) XRD patterns of the ZnS and (b) XRD patterns of six samples.

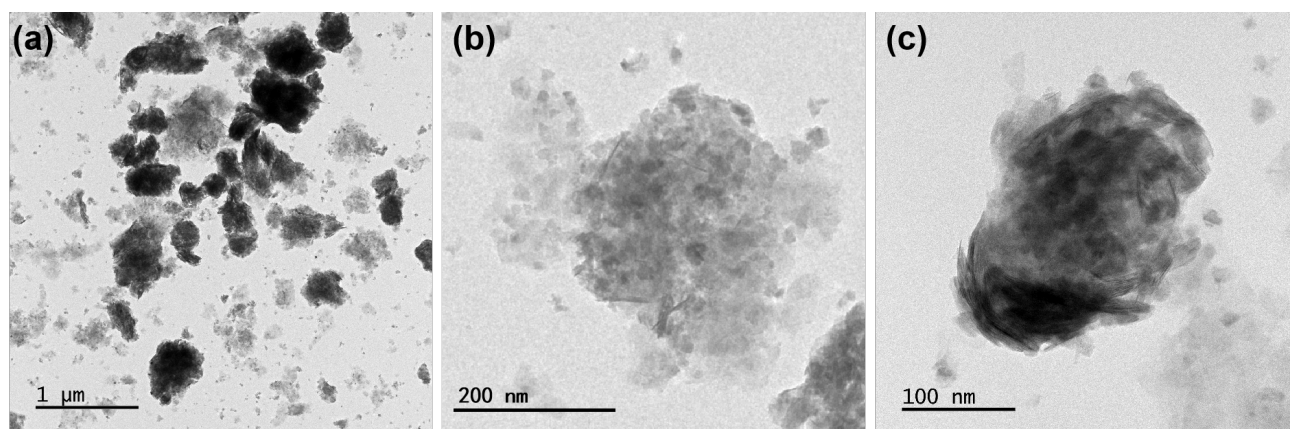

Fig. S2 TEM image of ZnS/ZnIn<sub>2</sub>S<sub>4</sub>-2.

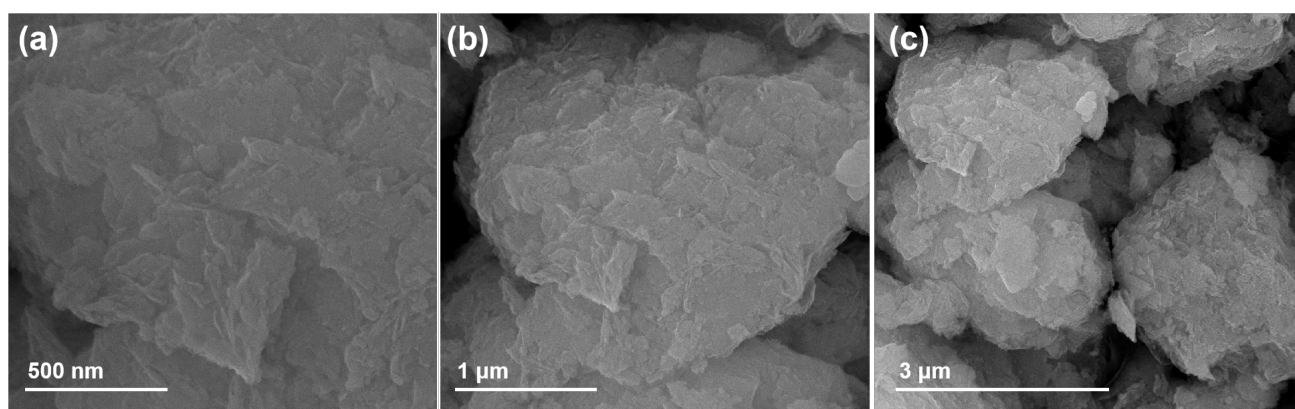

Fig. S3 SEM image of ZnS/ZnIn<sub>2</sub>S<sub>4</sub>-2.

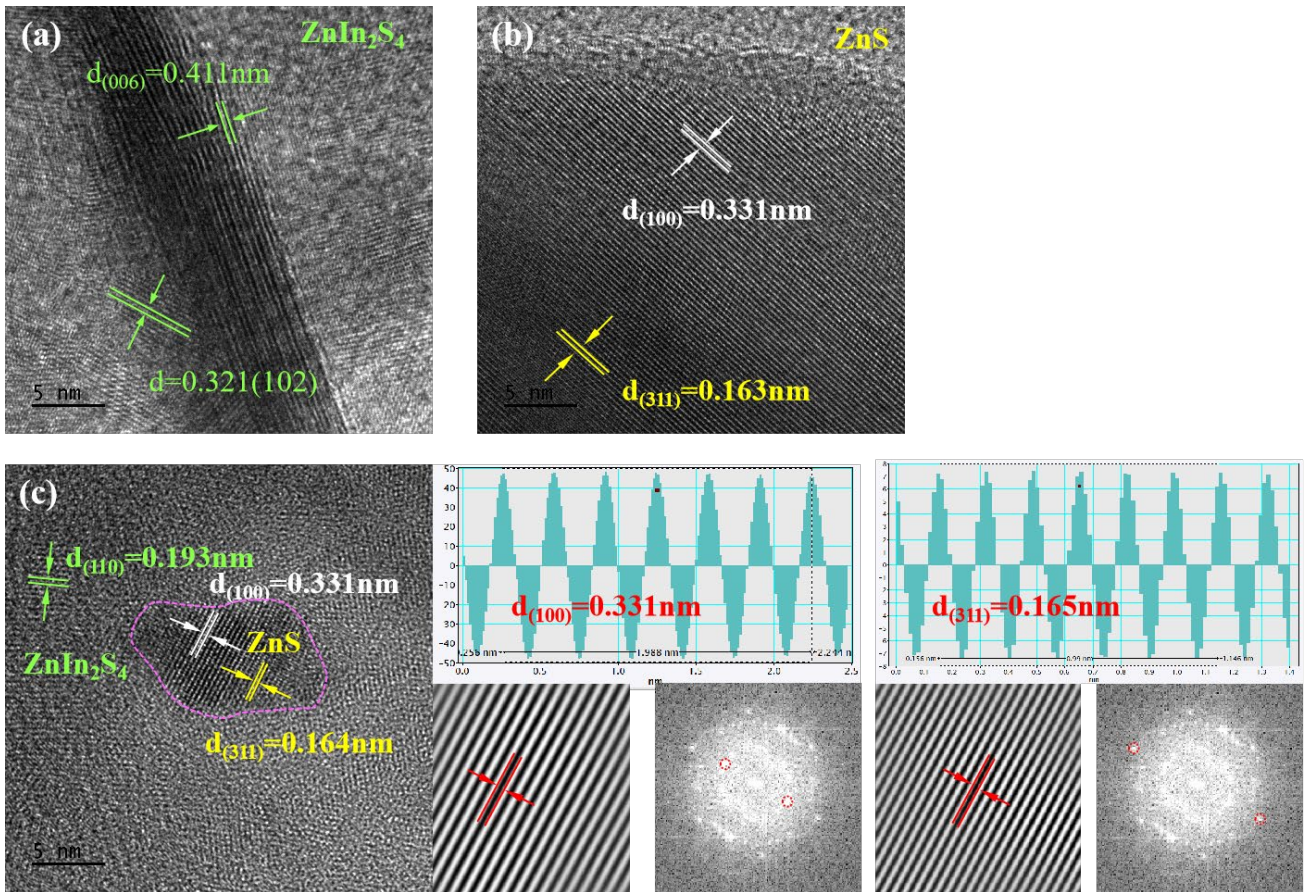

Fig. S4 HRTEM image of (a) ZnIn<sub>2</sub>S<sub>4</sub> (b) ZnS (c) ZnS/ZnIn<sub>2</sub>S<sub>4</sub>-2.

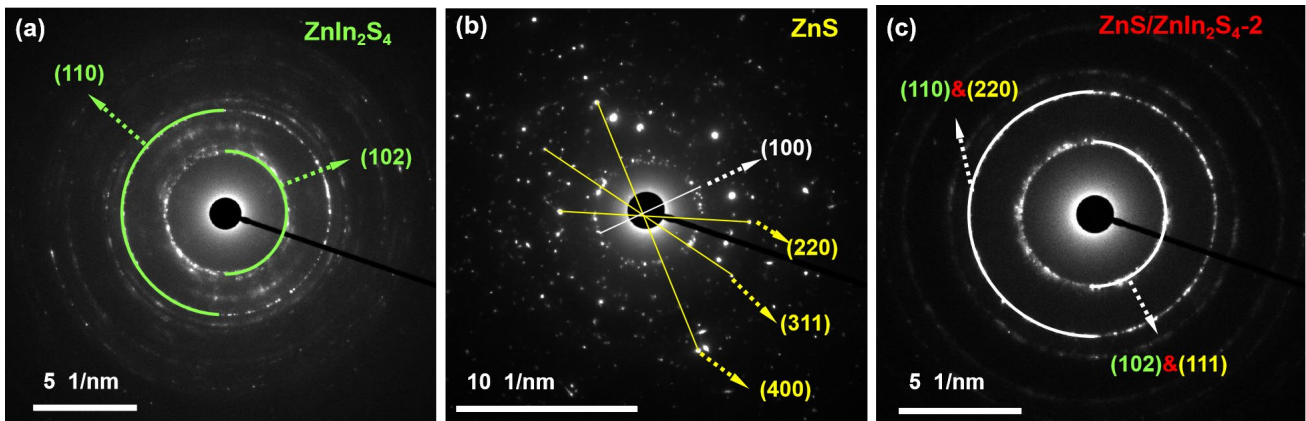

Fig. S5 SAED patterns of (a) ZnIn<sub>2</sub>S<sub>4</sub> (b) ZnS (c) ZnS/ZnIn<sub>2</sub>S<sub>4</sub>-2.



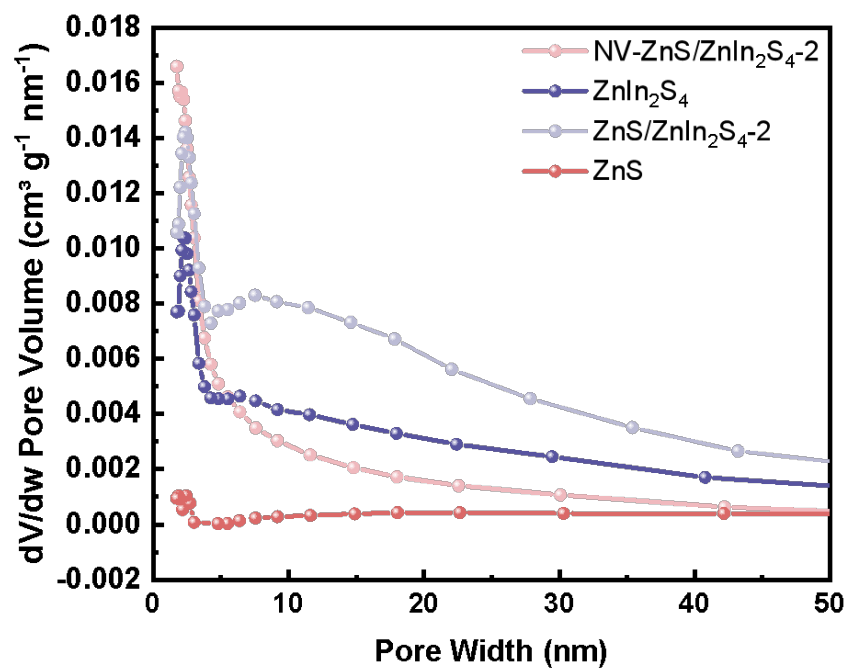

Fig. S6 The BJH pore size distribution curve of ZnIn<sub>2</sub>S<sub>4</sub>, ZnS, ZnS/ZnIn<sub>2</sub>S<sub>4</sub>-2 and NV-ZnS/ZnIn<sub>2</sub>S<sub>4</sub>-2.

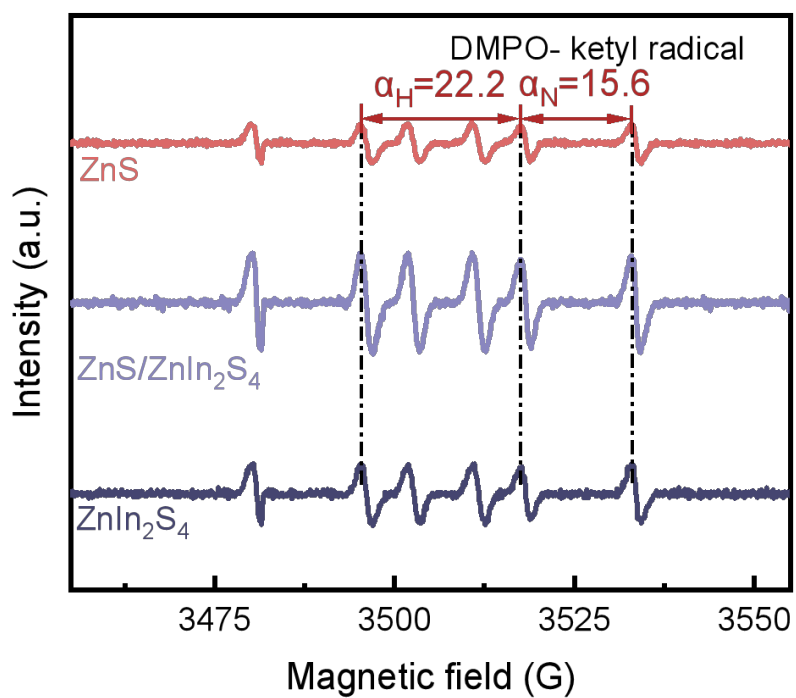

Fig. S7 EPR spectra of DMPO-ketyl radical for ZnS, ZnIn<sub>2</sub>S<sub>4</sub> and ZnS/ZnIn<sub>2</sub>S<sub>4</sub>-2.

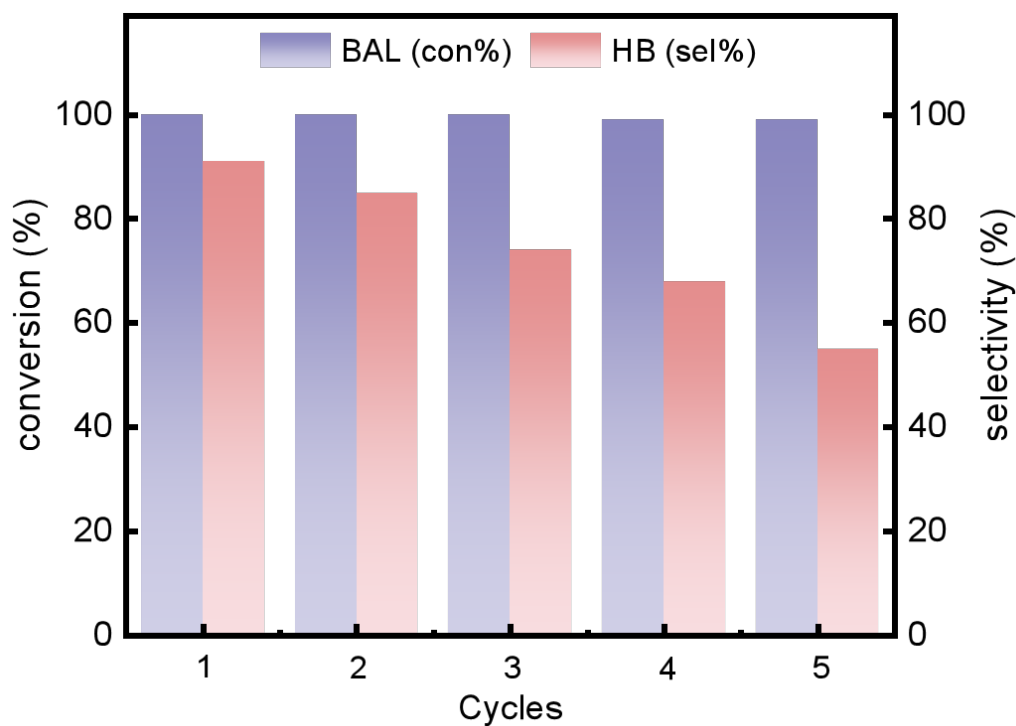

**Fig. S8** Stability test of ZnS/ZnIn<sub>2</sub>S<sub>4</sub>-2. Reaction conditions: 0.48mmol benzyl alcohol, 10 mg photocatalyst in 5 ml solvent under 415 nm LED irradiation for 2 h in air at room temperature.

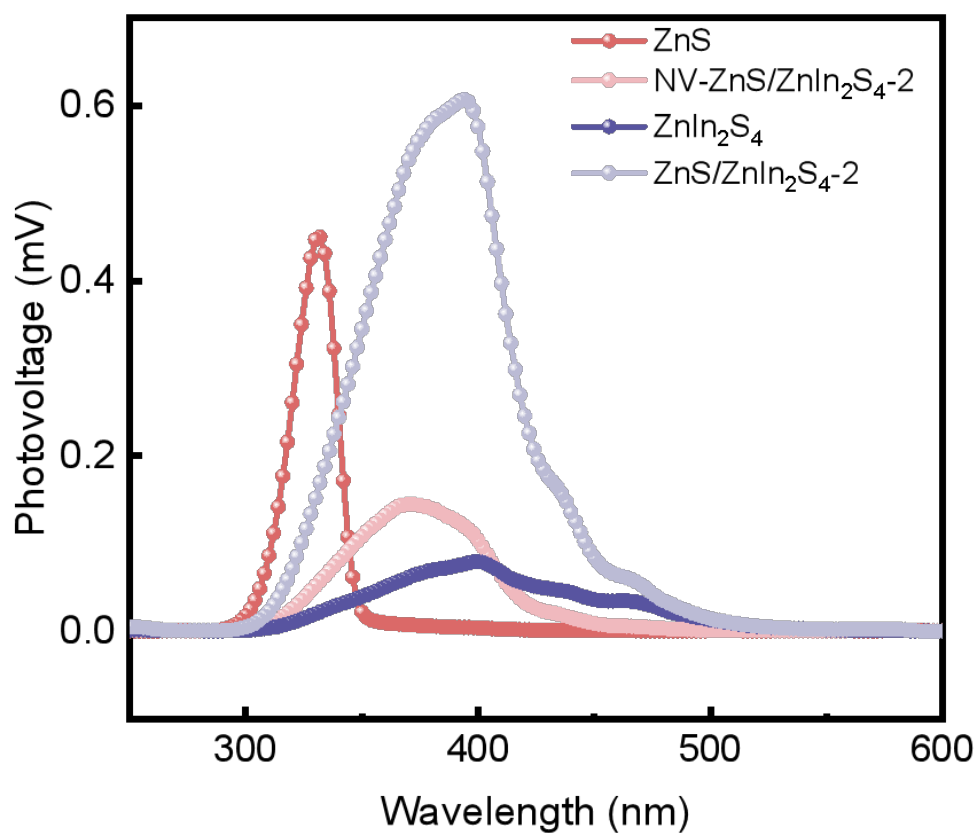

**Fig. S9** SPV spectra of ZnS, ZnIn<sub>2</sub>S<sub>4</sub>, ZnS/ZnIn<sub>2</sub>S<sub>4</sub>-2 and NV-ZnS/ZnIn<sub>2</sub>S<sub>4</sub>-2.

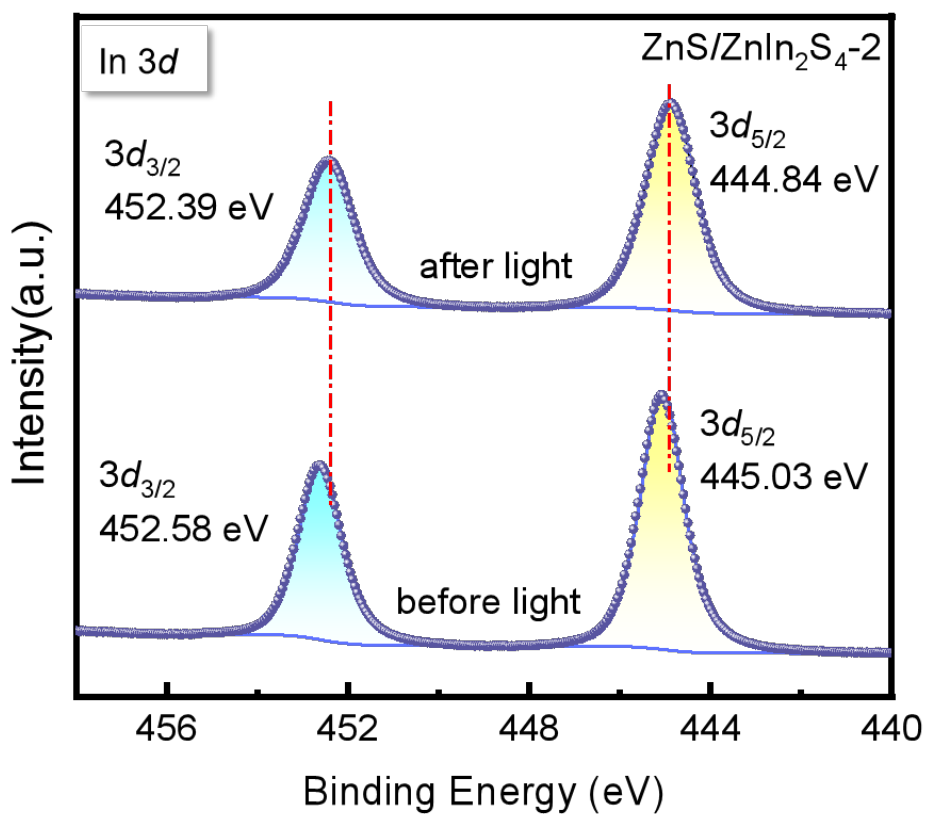

Fig. S10 In-situ XPS spectra of In of ZnS/ZnIn<sub>2</sub>S<sub>4</sub>-2 sample before and after light illumination.

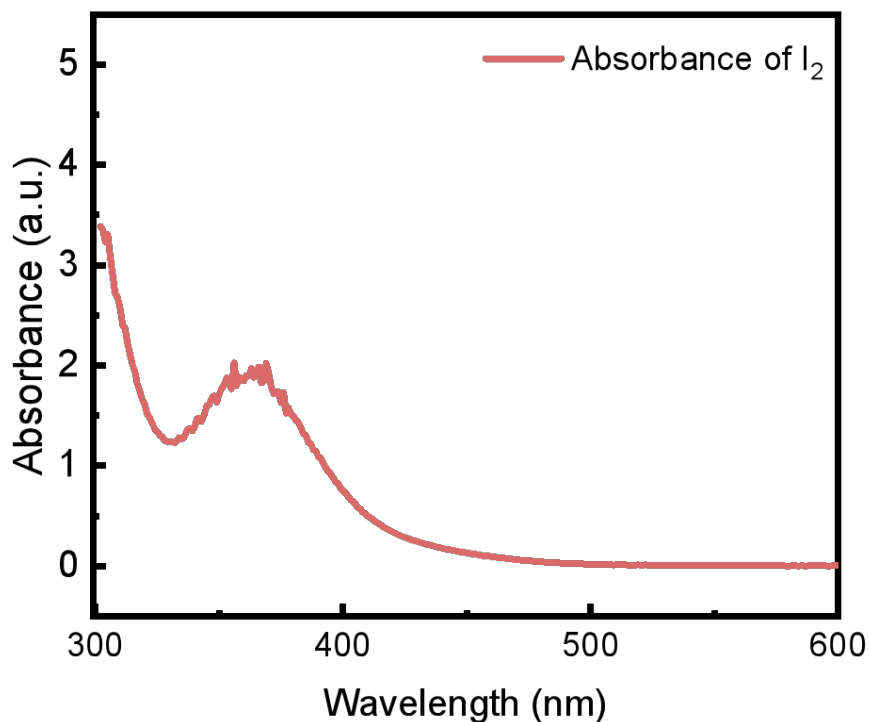

Fig. S11 Light absorption of I<sub>3</sub><sup>-</sup> (typical absorbance at 350 nm) in the solution after photocatalytic reaction with addition of excess KI to detect the produced H<sub>2</sub>O<sub>2</sub>.<sup>13</sup>

## Data for C-C coupling products of aryl alcohols

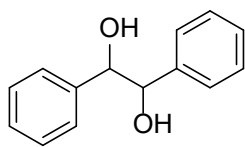

**Hydrobenzoin (1a):**  $^1\text{H}$  NMR (500 MHz, Chloroform-*d*)  $\delta$  7.31-7.29 (m, 6H), 7.25 - 7.22 (m, 4H), 4.81 (s, 2H), 2.32 (s, 2H).

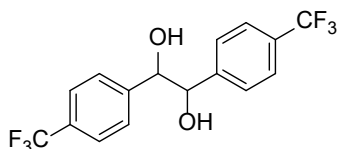

**1,2-Bis[4-(trifluoromethyl)phenyl]-1,2-ethanediol (2a):**  $^1\text{H}$  NMR (500 MHz, DMSO-*d*<sub>6</sub>)  $\delta$  7.64 (d,  $J$  = 8.1 Hz, 2H), 7.57 (d,  $J$  = 8.1 Hz, 2H), 7.50 (d,  $J$  = 8.0 Hz, 2H), 7.40 (d,  $J$  = 8.0 Hz, 2H), 5.65 (s, 1H), 5.59 (s, 1H), 4.83 (s, 1H), 4.67 (s, 1H).

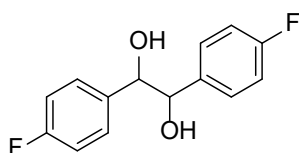

**1,2-Bis(4-fluorophenyl)-1,2-ethanediol (3a):**  $^1\text{H}$  NMR (500 MHz, DMSO-*d*<sub>6</sub>)  $\delta$  7.28 - 7.20 (m, 2H), 7.13 - 7.03 (m, 4H), 6.99 (t,  $J$  = 8.9 Hz, 2H), 5.46 (s, 1H), 5.33 (s, 1H), 4.61 (s, 1H), 4.57 (s, 1H).

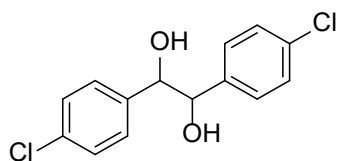

**1,2-Bis(4-chlorophenyl)-1,2-ethanediol (4a):**  $^1\text{H}$  NMR (500 MHz, DMSO-*d*<sub>6</sub>)  $\delta$  7.24 (d,  $J$  = 8.1 Hz, 4H), 7.11 (d,  $J$  = 8.2 Hz, 4H), 5.53 (s, 2H), 4.64 (s, 2H).

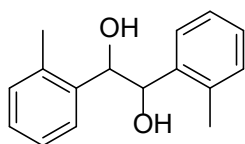

**1,2-Bis(2-methylphenyl)-1,2-ethanediol (5a):**  $^1\text{H}$  NMR (500 MHz, DMSO-*d*<sub>6</sub>)  $\delta$  7.50 (d,  $J$  = 7.9 Hz, 2H), 7.33 (dd,  $J$  = 7.0, 2.2 Hz, 2H), 7.15 - 6.98 (m, 10H), 6.87 (d,  $J$  = 7.7 Hz, 2H), 5.32 (s, 2H), 5.05 (s, 2H), 4.90 (s, 2H), 4.75 (s, 2H), 2.13 (s, 6H), 1.67 (s, 5H).

# <sup>1</sup>H NMR for C-C coupling products of aryl alcohols

Figure S6. <sup>1</sup>H NMR spectra of 1a recorded in Chloroform-*d*

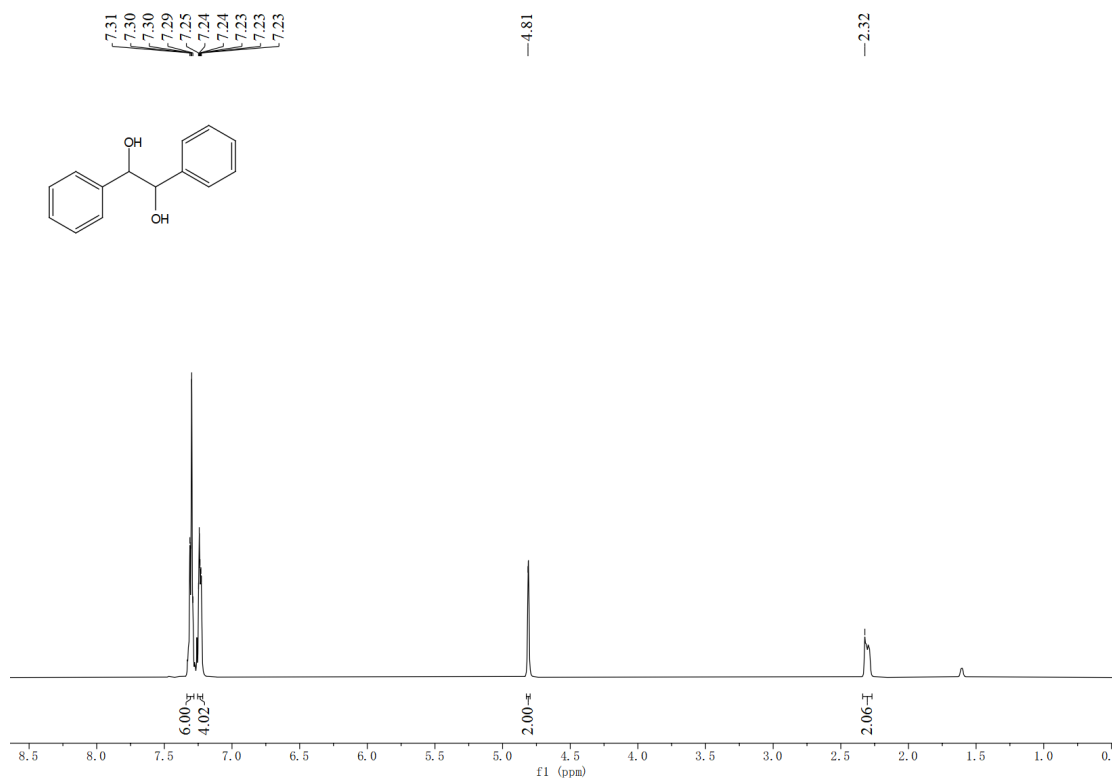

Figure S7. <sup>1</sup>H NMR spectra of 2a recorded in *d*<sub>6</sub>-DMSO

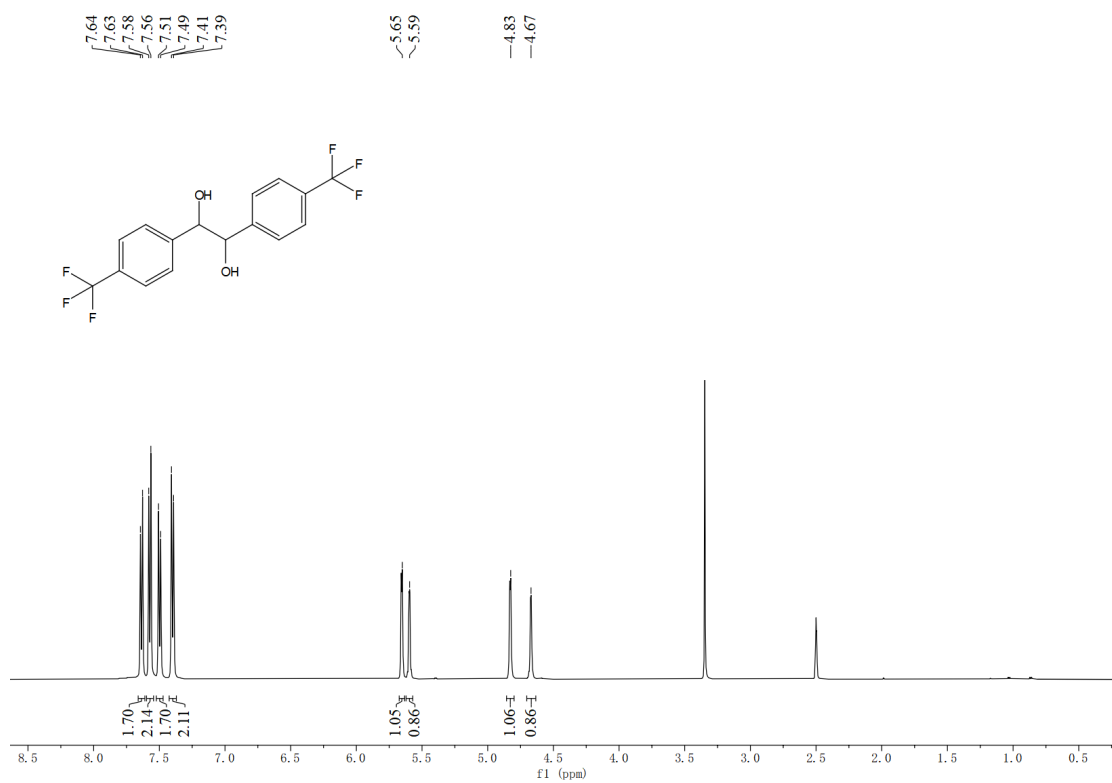

Figure S8.  $^1\text{H}$  NMR spectra of 3a recorded in  $d_6$ -DMSO

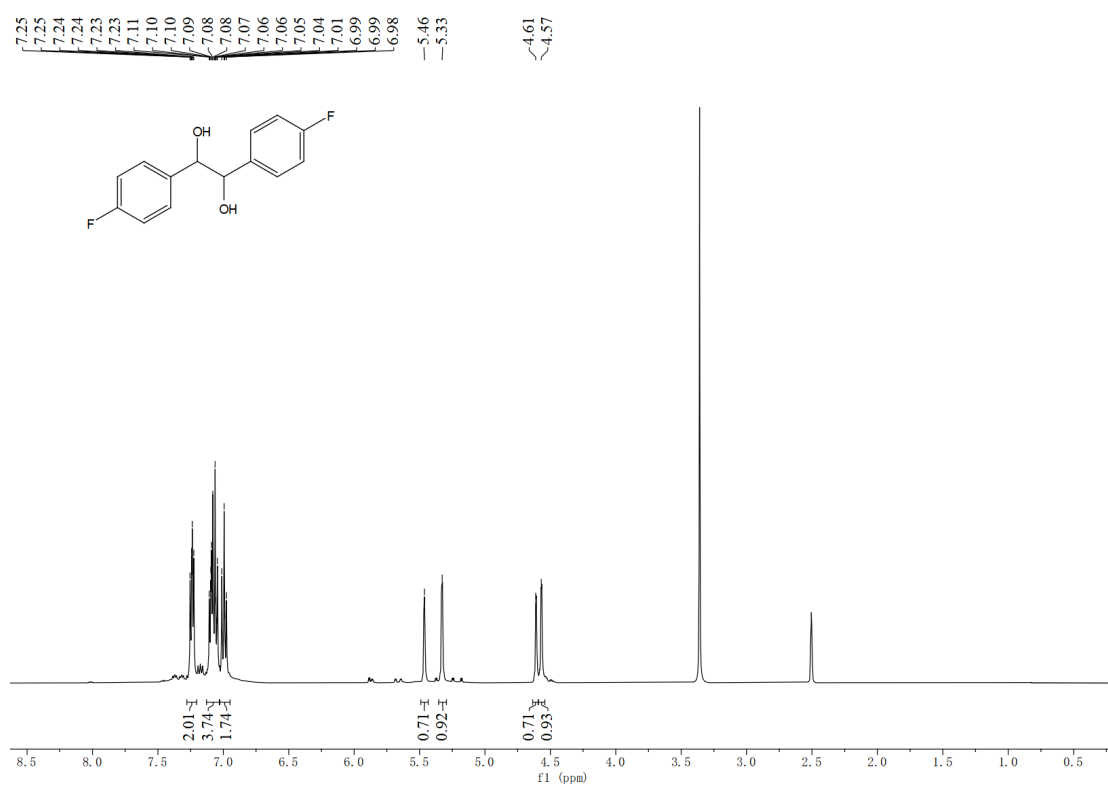

Figure S9.  $^1\text{H}$  NMR spectra of 4a recorded in  $d_6$ -DMSO

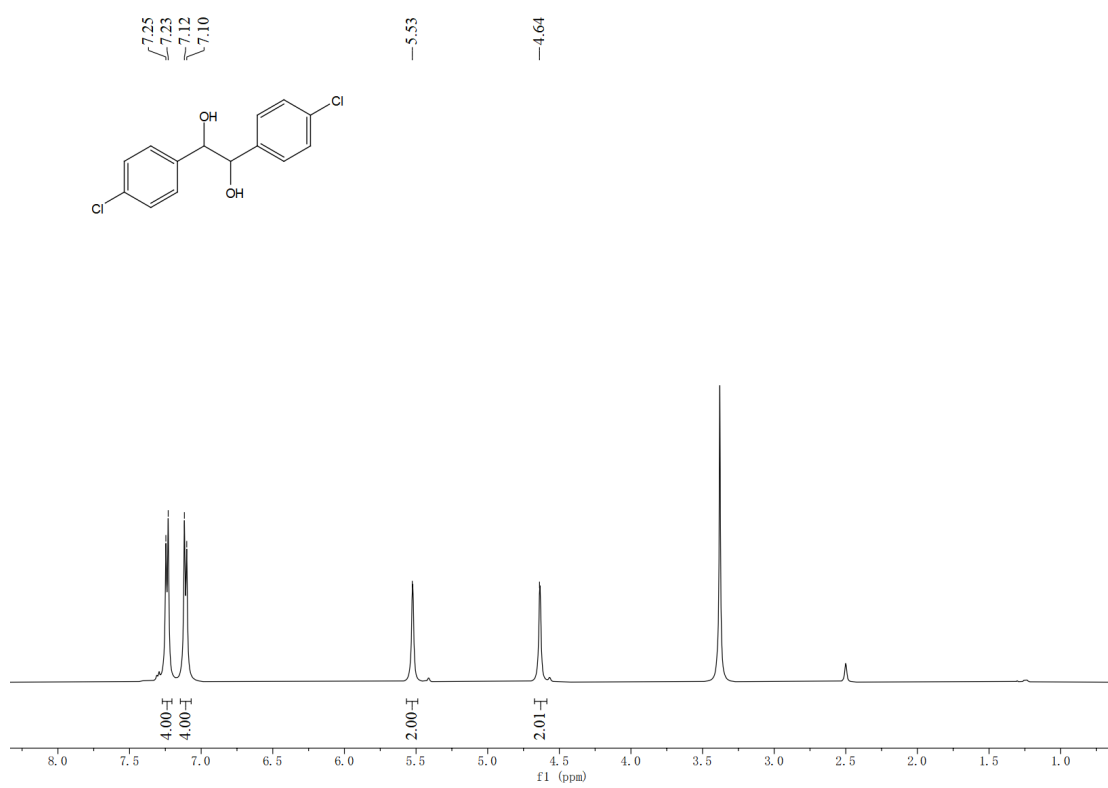

Figure S10.  $^1\text{H}$  NMR spectra of 5a recorded in  $d_6$ -DMSO

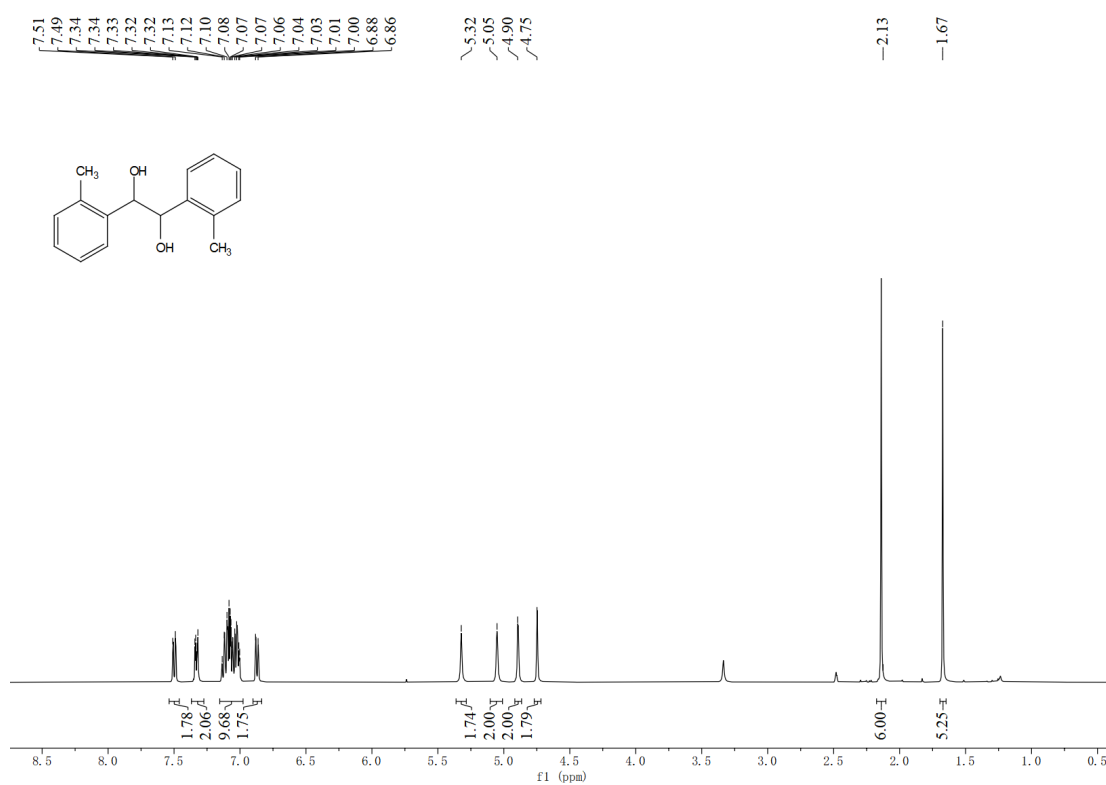

## References

- 1 L. Yuan, Y.-H. Li, Z.-R. Tang, J. Gong and Y.-J. Xu, *J. Catal.*, 2020, **390**, 244-250.
- 2 S. G. Lee, M. J. Kang, M. Park, K.-j. Kim, H. Lee and H. S. Kim, *Appl. Catal., B*, 2022, **304**, 120967.
- 3 S. An, M. J. Kang, H. Lee and H. S. Kim, *ACS Sustainable Chem. Eng.*, 2023, **11**, 4364-4373.
- 4 Z. Huang, P. Sun, H. Zhang, H. Zhang, S. Zhang, Z. Chen, X. Yi and S. Xie, *ACS Catal.*, 2024, **14**, 4581-4592.
- 5 N. Luo, T. Hou, S. Liu, B. Zeng, J. Lu, J. Zhang, H. Li and F. Wang, *ACS Catal.*, 2019, **10**, 762-769.
- 6 K. P. McClelland and E. A. Weiss, *ACS Appl. Energy Mater.*, 2019, **2**, 92-96.
- 7 G. Han, X. Liu, Z. Cao and Y. Sun, *ACS Catal.*, 2020, **10**, 9346-9355.
- 8 J.-Y. Li, M.-Y. Qi and Y.-J. Xu, *Chinese J. Catal.*, 2022, **43**, 1084-1091.
- 9 M.-Y. Qi, Q. Lin, Z.-R. Tang and Y.-J. Xu, *Appl. Catal., B*, 2022, **307**, 121158.
- 10 M. Zhang, K. Li, C. Hu, K. Ma, W. Sun, X. Huang and Y. Ding, *Chinese J. Catal.*, 2023, **47**, 254-264.
- 11 S. Zhao, S. Song, Y. You, Y. Zhang, W. Luo, K. Han, T. Ding, Y. Tian and X. Li, *Mol. Catal.*, 2022, **528**, 112429.
- 12 P. Bai, X. Tong, Y. Gao and S. Xue, *Sustainable Energy Fuels*, 2020, **4**, 5488-5492.
- 13 H. Zhao, D. Trivedi, M. Roostaeinia, X. Yong, J. Chen, P. Kumar, J. Liu, B.-L. Su, S. Larter, M. G. Kibria and J. Hu, *Green Chem.*, 2023, **25**, 692-699.
